# Supplementary material
Source: PubMed Central journal article supplement (PMC3664551)
Supplement: NIHMS459373-supplement-Supplemental_info.pdf [file NIHMS459373-supplement-Supplemental_info.pdf]

*Supplemental Information for:*

**A Comparison of the Johnson-Ettinger Vapor Intrusion Screening  
Model Predictions with Full Three-Dimensional Model Results.**

Yijun Yao, Rui Shen, Kelly Pennell and Eric Suuberg\*

School of Engineering.  
Brown University, Providence, RI 02912.

**Table 1.** Results from the J-E model as implemented on the EPA spreadsheet (SG-ADV-Feb04), in which soil diffusivity equals in-crack diffusivity

| $d_f(m)$ | $d_{source}(m)$ | $k(m^2)$ | $Q_{ck}(m^3/s)$ | $A_f(m^2)$ | $D_{eff}(m^2/s)$ | $D^{crack}(m^2/s)$ | $\alpha$ |
|----------|-----------------|----------|-----------------|------------|------------------|--------------------|----------|
| 2        | 3               | 1E-10    | 1.04E-03        | 180        | 1.04e-5          | 1.04e-5            | 6.25E-03 |
|          |                 | 1E-11    | 1.04E-04        | 180        | 1.04e-5          | 1.04e-5            | 2.64E-03 |
|          |                 | 1E-12    | 1.04E-05        | 180        | 1.04e-5          | 1.04e-5            | 3.89E-04 |
|          |                 | 1E-13    | 1.04E-06        | 180        | 1.04e-5          | 1.04e-5            | 7.62E-05 |
|          |                 | 1E-14    | 1.04E-07        | 180        | 1.04e-5          | 1.04e-5            | 5.55E-05 |
|          | 5               | 1E-10    | 1.04E-03        | 180        | 1.04e-5          | 1.04e-5            | 2.32E-03 |
|          |                 | 1E-11    | 1.04E-04        | 180        | 1.04e-5          | 1.04e-5            | 1.54E-03 |
|          |                 | 1E-12    | 1.04E-05        | 180        | 1.04e-5          | 1.04e-5            | 3.52E-04 |
|          |                 | 1E-13    | 1.04E-06        | 180        | 1.04e-5          | 1.04e-5            | 7.46E-05 |
|          |                 | 1E-14    | 1.04E-07        | 180        | 1.04e-5          | 1.04e-5            | 5.47E-05 |
|          | 8               | 1E-10    | 1.04E-03        | 180        | 1.04e-5          | 1.04e-5            | 1.19E-03 |
|          |                 | 1E-11    | 1.04E-04        | 180        | 1.04e-5          | 1.04e-5            | 9.45E-04 |
|          |                 | 1E-12    | 1.04E-05        | 180        | 1.04e-5          | 1.04e-5            | 3.08E-04 |
|          |                 | 1E-13    | 1.04E-06        | 180        | 1.04e-5          | 1.04e-5            | 7.24E-05 |
|          |                 | 1E-14    | 1.04E-07        | 180        | 1.04e-5          | 1.04e-5            | 5.35E-05 |
|          | 11              | 1E-10    | 1.04E-03        | 180        | 1.04e-5          | 1.04e-5            | 8.02E-04 |
|          |                 | 1E-11    | 1.04E-04        | 180        | 1.04e-5          | 1.04e-5            | 6.82E-04 |
|          |                 | 1E-12    | 1.04E-05        | 180        | 1.04e-5          | 1.04e-5            | 2.74E-04 |
|          |                 | 1E-13    | 1.04E-06        | 180        | 1.04e-5          | 1.04e-5            | 7.04E-05 |
|          |                 | 1E-14    | 1.04E-07        | 180        | 1.04e-5          | 1.04e-5            | 5.23E-05 |
| 14       | 1E-10           | 1.04E-03 | 180             | 1.04e-5    | 1.04e-5          | 6.05E-04           |          |
|          | 1E-11           | 1.04E-04 | 180             | 1.04e-5    | 1.04e-5          | 5.34E-04           |          |
|          | 1E-12           | 1.04E-05 | 180             | 1.04e-5    | 1.04e-5          | 2.46E-04           |          |
|          | 1E-13           | 1.04E-06 | 180             | 1.04e-5    | 1.04e-5          | 6.84E-05           |          |
|          | 1E-14           | 1.04E-07 | 180             | 1.04e-5    | 1.04e-5          | 5.12E-05           |          |
| 18       | 1E-10           | 1.04E-03 | 180             | 1.04e-5    | 1.04e-5          | 4.55E-04           |          |
|          | 1E-11           | 1.04E-04 | 180             | 1.04e-5    | 1.04e-5          | 4.14E-04           |          |
|          | 1E-12           | 1.04E-05 | 180             | 1.04e-5    | 1.04e-5          | 2.17E-04           |          |
|          | 1E-13           | 1.04E-06 | 180             | 1.04e-5    | 1.04e-5          | 6.59E-05           |          |
|          | 1E-14           | 1.04E-07 | 180             | 1.04e-5    | 1.04e-5          | 4.99E-05           |          |

| $d_f(m)$ | $d_{source}(m)$ | $k(m^2)$ | $Q_{ck}(m^3/s)$ | $A_f(m^2)$ | $D_{eff}(m^2/s)$ | $D^{crack}(m^2/s)$ | $\alpha$ |
|----------|-----------------|----------|-----------------|------------|------------------|--------------------|----------|
| 0.1      | 3               | 1E-10    | 1.89E-03        | 100        | 1.04e-5          | 1.04e-5            | 1.38E-03 |
|          |                 | 1E-11    | 1.89E-04        | 100        | 1.04e-5          | 1.04e-5            | 1.19E-03 |
|          |                 | 1E-12    | 1.89E-05        | 100        | 1.04e-5          | 1.04e-5            | 4.87E-04 |
|          |                 | 1E-13    | 1.89E-06        | 100        | 1.04e-5          | 1.04e-5            | 9.28E-05 |
|          |                 | 1E-14    | 1.89E-07        | 100        | 1.04e-5          | 1.04e-5            | 5.54E-05 |
|          | 5               | 1E-10    | 1.89E-03        | 100        | 1.04e-5          | 1.04e-5            | 8.26E-04 |
|          |                 | 1E-11    | 1.89E-04        | 100        | 1.04e-5          | 1.04e-5            | 7.51E-04 |
|          |                 | 1E-12    | 1.89E-05        | 100        | 1.04e-5          | 1.04e-5            | 3.93E-04 |
|          |                 | 1E-13    | 1.89E-06        | 100        | 1.04e-5          | 1.04e-5            | 8.88E-05 |
|          |                 | 1E-14    | 1.89E-07        | 100        | 1.04e-5          | 1.04e-5            | 5.39E-05 |
|          | 8               | 1E-10    | 1.89E-03        | 100        | 1.04e-5          | 1.04e-5            | 5.14E-04 |
|          |                 | 1E-11    | 1.89E-04        | 100        | 1.04e-5          | 1.04e-5            | 4.84E-04 |
|          |                 | 1E-12    | 1.89E-05        | 100        | 1.04e-5          | 1.04e-5            | 3.05E-04 |
|          |                 | 1E-13    | 1.89E-06        | 100        | 1.04e-5          | 1.04e-5            | 8.33E-05 |
|          |                 | 1E-14    | 1.89E-07        | 100        | 1.04e-5          | 1.04e-5            | 5.19E-05 |
|          | 11              | 1E-10    | 1.89E-03        | 100        | 1.04e-5          | 1.04e-5            | 3.74E-04 |
|          |                 | 1E-11    | 1.89E-04        | 100        | 1.04e-5          | 1.04e-5            | 3.57E-04 |
|          |                 | 1E-12    | 1.89E-05        | 100        | 1.04e-5          | 1.04e-5            | 2.49E-04 |
|          |                 | 1E-13    | 1.89E-06        | 100        | 1.04e-5          | 1.04e-5            | 7.85E-05 |
|          |                 | 1E-14    | 1.89E-07        | 100        | 1.04e-5          | 1.04e-5            | 5.00E-05 |
|          | 14              | 1E-10    | 1.89E-03        | 100        | 1.04e-5          | 1.04e-5            | 2.93E-04 |
|          |                 | 1E-11    | 1.89E-04        | 100        | 1.04e-5          | 1.04e-5            | 2.83E-04 |
|          |                 | 1E-12    | 1.89E-05        | 100        | 1.04e-5          | 1.04e-5            | 2.11E-04 |
|          |                 | 1E-13    | 1.89E-06        | 100        | 1.04e-5          | 1.04e-5            | 7.43E-05 |
|          |                 | 1E-14    | 1.89E-07        | 100        | 1.04e-5          | 1.04e-5            | 4.82E-05 |
|          | 18              | 1E-10    | 1.89E-03        | 100        | 1.04e-5          | 1.04e-5            | 2.29E-04 |
|          |                 | 1E-11    | 1.89E-04        | 100        | 1.04e-5          | 1.04e-5            | 2.22E-04 |
|          |                 | 1E-12    | 1.89E-05        | 100        | 1.04e-5          | 1.04e-5            | 1.75E-04 |
|          |                 | 1E-13    | 1.89E-06        | 100        | 1.04e-5          | 1.04e-5            | 6.93E-05 |
|          |                 | 1E-14    | 1.89E-07        | 100        | 1.04e-5          | 1.04e-5            | 4.61E-05 |

**Table 2.** Results from the J-E model as implemented on the EPA spreadsheet (SG-ADV-Feb04), in which in-crack diffusivity for the contaminant is its diffusivity in air

| $d_f(m)$ | $d_{source}(m)$ | $k(m^2)$ | $Q_{ck}(m^3/s)$ | $A_f(m^2)$ | $D_{eff}(m^2/s)$ | $D^{crack}(m^2/s)$ | $\alpha$ |
|----------|-----------------|----------|-----------------|------------|------------------|--------------------|----------|
| 2        | 3               | 1E-10    | 4.57E-04        | 180        | 1.04e-5          | 7.4e-5             | 5.22E-03 |
|          |                 | 1E-11    | 4.57E-05        | 180        | 1.04e-5          | 7.4e-5             | 1.46E-03 |
|          |                 | 1E-12    | 4.57E-06        | 180        | 1.04e-5          | 7.4e-5             | 4.50E-04 |
|          |                 | 1E-13    | 4.57E-07        | 180        | 1.04e-5          | 7.4e-5             | 3.72E-04 |
|          |                 | 1E-14    | 4.57E-08        | 180        | 1.04e-5          | 7.4e-5             | 3.65E-04 |
|          | 5               | 1E-10    | 4.57E-04        | 180        | 1.04e-5          | 7.4e-5             | 2.16E-03 |
|          |                 | 1E-11    | 4.57E-05        | 180        | 1.04e-5          | 7.4e-5             | 1.04E-03 |
|          |                 | 1E-12    | 4.57E-06        | 180        | 1.04e-5          | 7.4e-5             | 4.01E-04 |
|          |                 | 1E-13    | 4.57E-07        | 180        | 1.04e-5          | 7.4e-5             | 3.38E-04 |
|          |                 | 1E-14    | 4.57E-08        | 180        | 1.04e-5          | 7.4e-5             | 3.32E-04 |
|          | 8               | 1E-10    | 4.57E-04        | 180        | 1.04e-5          | 7.4e-5             | 1.15E-03 |
|          |                 | 1E-11    | 4.57E-05        | 180        | 1.04e-5          | 7.4e-5             | 7.32E-04 |
|          |                 | 1E-12    | 4.57E-06        | 180        | 1.04e-5          | 7.4e-5             | 3.45E-04 |
|          |                 | 1E-13    | 4.57E-07        | 180        | 1.04e-5          | 7.4e-5             | 2.97E-04 |
|          |                 | 1E-14    | 4.57E-08        | 180        | 1.04e-5          | 7.4e-5             | 2.92E-04 |
|          | 11              | 1E-10    | 4.57E-04        | 180        | 1.04e-5          | 7.4e-5             | 7.83E-04 |
|          |                 | 1E-11    | 4.57E-05        | 180        | 1.04e-5          | 7.4e-5             | 5.64E-04 |
|          |                 | 1E-12    | 4.57E-06        | 180        | 1.04e-5          | 7.4e-5             | 3.02E-04 |
|          |                 | 1E-13    | 4.57E-07        | 180        | 1.04e-5          | 7.4e-5             | 2.65E-04 |
|          |                 | 1E-14    | 4.57E-08        | 180        | 1.04e-5          | 7.4e-5             | 2.61E-04 |
|          | 14              | 1E-10    | 4.57E-04        | 180        | 1.04e-5          | 7.4e-5             | 5.93E-04 |
|          |                 | 1E-11    | 4.57E-05        | 180        | 1.04e-5          | 7.4e-5             | 4.59E-04 |
|          |                 | 1E-12    | 4.57E-06        | 180        | 1.04e-5          | 7.4e-5             | 2.69E-04 |
|          |                 | 1E-13    | 4.57E-07        | 180        | 1.04e-5          | 7.4e-5             | 2.39E-04 |
|          |                 | 1E-14    | 4.57E-08        | 180        | 1.04e-5          | 7.4e-5             | 2.36E-04 |
|          | 18              | 1E-10    | 4.57E-04        | 180        | 1.04e-5          | 7.4e-5             | 4.49E-04 |
|          |                 | 1E-11    | 4.57E-05        | 180        | 1.04e-5          | 7.4e-5             | 3.67E-04 |
|          |                 | 1E-12    | 4.57E-06        | 180        | 1.04e-5          | 7.4e-5             | 2.35E-04 |
| 1E-13    |                 | 4.57E-07 | 180             | 1.04e-5    | 7.4e-5           | 2.12E-04           |          |
| 1E-14    |                 | 4.57E-08 | 180             | 1.04e-5    | 7.4e-5           | 2.09E-04           |          |

| $d_f(m)$ | $d_{source}(m)$ | $k(m^2)$ | $Q_{ck}(m^3/s)$ | $A_f(m^2)$ | $D_{eff}(m^2/s)$ | $D^{crack}(m^2/s)$ | $\alpha$ |
|----------|-----------------|----------|-----------------|------------|------------------|--------------------|----------|
| 0.1      | 3               | 1E-10    | 7.69E-04        | 100        | 1.04e-5          | 7.4e-5             | 1.35E-03 |
|          |                 | 1E-11    | 7.69E-05        | 100        | 1.04e-5          | 7.4e-5             | 9.62E-04 |
|          |                 | 1E-12    | 7.69E-06        | 100        | 1.04e-5          | 7.4e-5             | 3.98E-04 |
|          |                 | 1E-13    | 7.69E-07        | 100        | 1.04e-5          | 7.4e-5             | 3.11E-04 |
|          |                 | 1E-14    | 7.69E-08        | 100        | 1.04e-5          | 7.4e-5             | 3.02E-04 |
|          | 5               | 1E-10    | 7.69E-04        | 100        | 1.04e-5          | 7.4e-5             | 8.13E-04 |
|          |                 | 1E-11    | 7.69E-05        | 100        | 1.04e-5          | 7.4e-5             | 6.54E-04 |
|          |                 | 1E-12    | 7.69E-06        | 100        | 1.04e-5          | 7.4e-5             | 3.33E-04 |
|          |                 | 1E-13    | 7.69E-07        | 100        | 1.04e-5          | 7.4e-5             | 2.70E-04 |
|          |                 | 1E-14    | 7.69E-08        | 100        | 1.04e-5          | 7.4e-5             | 2.63E-04 |
|          | 8               | 1E-10    | 7.69E-04        | 100        | 1.04e-5          | 7.4e-5             | 5.09E-04 |
|          |                 | 1E-11    | 7.69E-05        | 100        | 1.04e-5          | 7.4e-5             | 4.42E-04 |
|          |                 | 1E-12    | 7.69E-06        | 100        | 1.04e-5          | 7.4e-5             | 2.68E-04 |
|          |                 | 1E-13    | 7.69E-07        | 100        | 1.04e-5          | 7.4e-5             | 2.25E-04 |
|          |                 | 1E-14    | 7.69E-08        | 100        | 1.04e-5          | 7.4e-5             | 2.21E-04 |
|          | 11              | 1E-10    | 7.69E-04        | 100        | 1.04e-5          | 7.4e-5             | 3.71E-04 |
|          |                 | 1E-11    | 7.69E-05        | 100        | 1.04e-5          | 7.4e-5             | 3.34E-04 |
|          |                 | 1E-12    | 7.69E-06        | 100        | 1.04e-5          | 7.4e-5             | 2.24E-04 |
|          |                 | 1E-13    | 7.69E-07        | 100        | 1.04e-5          | 7.4e-5             | 1.93E-04 |
|          |                 | 1E-14    | 7.69E-08        | 100        | 1.04e-5          | 7.4e-5             | 1.90E-04 |
|          | 14              | 1E-10    | 7.69E-04        | 100        | 1.04e-5          | 7.4e-5             | 2.92E-04 |
|          |                 | 1E-11    | 7.69E-05        | 100        | 1.04e-5          | 7.4e-5             | 2.68E-04 |
|          |                 | 1E-12    | 7.69E-06        | 100        | 1.04e-5          | 7.4e-5             | 1.92E-04 |
|          |                 | 1E-13    | 7.69E-07        | 100        | 1.04e-5          | 7.4e-5             | 1.69E-04 |
|          |                 | 1E-14    | 7.69E-08        | 100        | 1.04e-5          | 7.4e-5             | 1.67E-04 |
|          | 18              | 1E-10    | 7.69E-04        | 100        | 1.04e-5          | 7.4e-5             | 2.29E-04 |
|          |                 | 1E-11    | 7.69E-05        | 100        | 1.04e-5          | 7.4e-5             | 2.13E-04 |
|          |                 | 1E-12    | 7.69E-06        | 100        | 1.04e-5          | 7.4e-5             | 1.62E-04 |
|          |                 | 1E-13    | 7.69E-07        | 100        | 1.04e-5          | 7.4e-5             | 1.45E-04 |
|          |                 | 1E-14    | 7.69E-08        | 100        | 1.04e-5          | 7.4e-5             | 1.43E-04 |

**Table 3.** Results from the J-E model as implemented on the EPA spreadsheet, except air diffusivity in the crack and the mass conservation ratio applied to the result

| $d_f(m)$ | $d_{source}(m)$ | $k(m^2)$ | $Q_{ck}(m^3/s)$ | $A_f(m^2)$ | $D_{eff}(m^2/s)$ | $D^{crack}(m^2/s)$ | $r_f$ | $\alpha$ |
|----------|-----------------|----------|-----------------|------------|------------------|--------------------|-------|----------|
| 2        | 3               | 1E-10    | 4.57E-04        | 180        | 1.04e-5          | 7.4e-5             | 2.26  | 3.06E-03 |
|          |                 | 1E-11    | 4.57E-05        | 180        | 1.04e-5          | 7.4e-5             | 0.59  | 4.41E-04 |
|          |                 | 1E-12    | 4.57E-06        | 180        | 1.04e-5          | 7.4e-5             | 0.14  | 7.04E-05 |
|          |                 | 1E-13    | 4.57E-07        | 180        | 1.04e-5          | 7.4e-5             | 0.10  | 5.31E-05 |
|          |                 | 1E-14    | 4.57E-08        | 180        | 1.04e-5          | 7.4e-5             | 0.10  | 5.11E-05 |
|          | 5               | 1E-10    | 4.57E-04        | 180        | 1.04e-5          | 7.4e-5             | 2.80  | 2.30E-03 |
|          |                 | 1E-11    | 4.57E-05        | 180        | 1.04e-5          | 7.4e-5             | 0.75  | 3.11E-04 |
|          |                 | 1E-12    | 4.57E-06        | 180        | 1.04e-5          | 7.4e-5             | 0.14  | 4.82E-05 |
|          |                 | 1E-13    | 4.57E-07        | 180        | 1.04e-5          | 7.4e-5             | 0.12  | 3.22E-05 |
|          |                 | 1E-14    | 4.57E-08        | 180        | 1.04e-5          | 7.4e-5             | 0.11  | 3.08E-05 |
|          | 8               | 1E-10    | 4.57E-04        | 180        | 1.04e-5          | 7.4e-5             | 3.14  | 1.65E-03 |
|          |                 | 1E-11    | 4.57E-05        | 180        | 1.04e-5          | 7.4e-5             | 0.84  | 2.11E-04 |
|          |                 | 1E-12    | 4.57E-06        | 180        | 1.04e-5          | 7.4e-5             | 0.17  | 3.19E-05 |
|          |                 | 1E-13    | 4.57E-07        | 180        | 1.04e-5          | 7.4e-5             | 0.13  | 2.13E-05 |
|          |                 | 1E-14    | 4.57E-08        | 180        | 1.04e-5          | 7.4e-5             | 0.12  | 2.03E-05 |
|          | 11              | 1E-10    | 4.57E-04        | 180        | 1.04e-5          | 7.4e-5             | 3.18  | 1.26E-03 |
|          |                 | 1E-11    | 4.57E-05        | 180        | 1.04e-5          | 7.4e-5             | 0.86  | 1.58E-04 |
|          |                 | 1E-12    | 4.57E-06        | 180        | 1.04e-5          | 7.4e-5             | 0.17  | 2.37E-05 |
|          |                 | 1E-13    | 4.57E-07        | 180        | 1.04e-5          | 7.4e-5             | 0.13  | 1.58E-05 |
|          |                 | 1E-14    | 4.57E-08        | 180        | 1.04e-5          | 7.4e-5             | 0.12  | 1.51E-05 |
|          | 14              | 1E-10    | 4.57E-04        | 180        | 1.04e-5          | 7.4e-5             | 3.20  | 1.00E-03 |
|          |                 | 1E-11    | 4.57E-05        | 180        | 1.04e-5          | 7.4e-5             | 0.87  | 1.25E-04 |
|          |                 | 1E-12    | 4.57E-06        | 180        | 1.04e-5          | 7.4e-5             | 0.17  | 1.88E-05 |
|          |                 | 1E-13    | 4.57E-07        | 180        | 1.04e-5          | 7.4e-5             | 0.13  | 1.25E-05 |
|          |                 | 1E-14    | 4.57E-08        | 180        | 1.04e-5          | 7.4e-5             | 0.12  | 1.19E-05 |
|          | 18              | 1E-10    | 4.57E-04        | 180        | 1.04e-5          | 7.4e-5             | 3.20  | 7.91E-04 |
|          |                 | 1E-11    | 4.57E-05        | 180        | 1.04e-5          | 7.4e-5             | 0.88  | 9.89E-05 |
|          |                 | 1E-12    | 4.57E-06        | 180        | 1.04e-5          | 7.4e-5             | 0.17  | 1.47E-05 |
|          |                 | 1E-13    | 4.57E-07        | 180        | 1.04e-5          | 7.4e-5             | 0.13  | 9.74E-06 |
|          |                 | 1E-14    | 4.57E-08        | 180        | 1.04e-5          | 7.4e-5             | 0.12  | 9.30E-06 |

| $d_f(m)$ | $d_{source}(m)$ | $k(m^2)$ | $Q_{ck}(m^3/s)$ | $A_f(m^2)$ | $D_{eff}(m^2/s)$ | $D^{crack}(m^2/s)$ | $r_f$    | $\alpha$ |
|----------|-----------------|----------|-----------------|------------|------------------|--------------------|----------|----------|
| 0.1      | 3               | 1E-10    | 7.69E-04        | 100        | 1.04e-5          | 7.4e-5             | 2.41     | 3.06E-03 |
|          |                 | 1E-11    | 7.69E-05        | 100        | 1.04e-5          | 7.4e-5             | 0.37     | 4.41E-04 |
|          |                 | 1E-12    | 7.69E-06        | 100        | 1.04e-5          | 7.4e-5             | 0.06     | 7.04E-05 |
|          |                 | 1E-13    | 7.69E-07        | 100        | 1.04e-5          | 7.4e-5             | 0.04     | 5.31E-05 |
|          |                 | 1E-14    | 7.69E-08        | 100        | 1.04e-5          | 7.4e-5             | 0.04     | 5.11E-05 |
|          | 5               | 1E-10    | 7.69E-04        | 100        | 1.04e-5          | 7.4e-5             | 2.97     | 2.30E-03 |
|          |                 | 1E-11    | 7.69E-05        | 100        | 1.04e-5          | 7.4e-5             | 0.41     | 3.11E-04 |
|          |                 | 1E-12    | 7.69E-06        | 100        | 1.04e-5          | 7.4e-5             | 0.06     | 4.82E-05 |
|          |                 | 1E-13    | 7.69E-07        | 100        | 1.04e-5          | 7.4e-5             | 0.04     | 3.22E-05 |
|          |                 | 1E-14    | 7.69E-08        | 100        | 1.04e-5          | 7.4e-5             | 0.04     | 3.08E-05 |
|          | 8               | 1E-10    | 7.69E-04        | 100        | 1.04e-5          | 7.4e-5             | 3.37     | 1.65E-03 |
|          |                 | 1E-11    | 7.69E-05        | 100        | 1.04e-5          | 7.4e-5             | 0.44     | 2.11E-04 |
|          |                 | 1E-12    | 7.69E-06        | 100        | 1.04e-5          | 7.4e-5             | 0.07     | 3.19E-05 |
|          |                 | 1E-13    | 7.69E-07        | 100        | 1.04e-5          | 7.4e-5             | 0.04     | 2.13E-05 |
|          |                 | 1E-14    | 7.69E-08        | 100        | 1.04e-5          | 7.4e-5             | 0.04     | 2.03E-05 |
|          | 11              | 1E-10    | 7.69E-04        | 100        | 1.04e-5          | 7.4e-5             | 3.50     | 1.26E-03 |
|          |                 | 1E-11    | 7.69E-05        | 100        | 1.04e-5          | 7.4e-5             | 0.44     | 1.58E-04 |
|          |                 | 1E-12    | 7.69E-06        | 100        | 1.04e-5          | 7.4e-5             | 0.07     | 2.37E-05 |
|          |                 | 1E-13    | 7.69E-07        | 100        | 1.04e-5          | 7.4e-5             | 0.04     | 1.58E-05 |
|          |                 | 1E-14    | 7.69E-08        | 100        | 1.04e-5          | 7.4e-5             | 0.04     | 1.51E-05 |
| 14       | 1E-10           | 7.69E-04 | 100             | 1.04e-5    | 7.4e-5           | 3.53               | 1.00E-03 |          |
|          | 1E-11           | 7.69E-05 | 100             | 1.04e-5    | 7.4e-5           | 0.44               | 1.25E-04 |          |
|          | 1E-12           | 7.69E-06 | 100             | 1.04e-5    | 7.4e-5           | 0.07               | 1.88E-05 |          |
|          | 1E-13           | 7.69E-07 | 100             | 1.04e-5    | 7.4e-5           | 0.04               | 1.25E-05 |          |
|          | 1E-14           | 7.69E-08 | 100             | 1.04e-5    | 7.4e-5           | 0.04               | 1.19E-05 |          |
| 18       | 1E-10           | 7.69E-04 | 100             | 1.04e-5    | 7.4e-5           | 3.55               | 7.91E-04 |          |
|          | 1E-11           | 7.69E-05 | 100             | 1.04e-5    | 7.4e-5           | 0.45               | 9.89E-05 |          |
|          | 1E-12           | 7.69E-06 | 100             | 1.04e-5    | 7.4e-5           | 0.07               | 1.47E-05 |          |
|          | 1E-13           | 7.69E-07 | 100             | 1.04e-5    | 7.4e-5           | 0.04               | 9.74E-06 |          |
|          | 1E-14           | 7.69E-08 | 100             | 1.04e-5    | 7.4e-5           | 0.04               | 9.30E-06 |          |

**Table 4.** Results from 3-D simulations as presented in Figure 3 of the manuscript

| $d_f(m)$ | $d_{source}(m)$ | $k(m^2)$ | $Q_{ck}(m^3/s)$ | $D_{eff}(m^2/s)$ | $D^{crack}(m^2/s)$ | $\alpha$ |
|----------|-----------------|----------|-----------------|------------------|--------------------|----------|
| 2        | 3               | 1E-10    | 4.24E-04        | 1.04e-5          | 7.4e-5             | 7.03E-03 |
|          |                 | 1E-11    | 4.24E-05        | 1.04e-5          | 7.4e-5             | 1.31E-03 |
|          |                 | 1E-12    | 4.24E-06        | 1.04e-5          | 7.4e-5             | 2.88E-04 |
|          |                 | 1E-13    | 4.24E-07        | 1.04e-5          | 7.4e-5             | 2.20E-04 |
|          |                 | 1E-14    | 4.24E-08        | 1.04e-5          | 7.4e-5             | 2.14E-04 |
|          | 5               | 1E-10    | 4.68E-04        | 1.04e-5          | 7.4e-5             | 5.58E-03 |
|          |                 | 1E-11    | 4.68E-05        | 1.04e-5          | 7.4e-5             | 1.02E-03 |
|          |                 | 1E-12    | 4.68E-06        | 1.04e-5          | 7.4e-5             | 1.84E-04 |
|          |                 | 1E-13    | 4.68E-07        | 1.04e-5          | 7.4e-5             | 1.54E-04 |
|          |                 | 1E-14    | 4.68E-08        | 1.04e-5          | 7.4e-5             | 1.49E-04 |
|          | 8               | 1E-10    | 4.50E-04        | 1.04e-5          | 7.4e-5             | 4.08E-03 |
|          |                 | 1E-11    | 4.50E-05        | 1.04e-5          | 7.4e-5             | 7.34E-04 |
|          |                 | 1E-12    | 4.50E-06        | 1.04e-5          | 7.4e-5             | 1.44E-04 |
|          |                 | 1E-13    | 4.50E-07        | 1.04e-5          | 7.4e-5             | 1.06E-04 |
|          |                 | 1E-14    | 4.50E-08        | 1.04e-5          | 7.4e-5             | 1.03E-04 |
|          | 11              | 1E-10    | 4.52E-04        | 1.04e-5          | 7.4e-5             | 2.94E-03 |
|          |                 | 1E-11    | 4.52E-05        | 1.04e-5          | 7.4e-5             | 5.56E-04 |
|          |                 | 1E-12    | 4.52E-06        | 1.04e-5          | 7.4e-5             | 1.09E-04 |
|          |                 | 1E-13    | 4.52E-07        | 1.04e-5          | 7.4e-5             | 7.98E-05 |
|          |                 | 1E-14    | 4.52E-08        | 1.04e-5          | 7.4e-5             | 7.73E-05 |
| 14       | 1E-10           | 4.52E-04 | 1.04e-5         | 7.4e-5           | 2.21E-03           |          |
|          | 1E-11           | 4.52E-05 | 1.04e-5         | 7.4e-5           | 4.43E-04           |          |
|          | 1E-12           | 4.52E-06 | 1.04e-5         | 7.4e-5           | 8.67E-05           |          |
|          | 1E-13           | 4.52E-07 | 1.04e-5         | 7.4e-5           | 6.37E-05           |          |
|          | 1E-14           | 4.52E-08 | 1.04e-5         | 7.4e-5           | 6.17E-05           |          |
| 18       | 1E-10           | 4.56E-04 | 1.04e-5         | 7.4e-5           | 1.64E-03           |          |
|          | 1E-11           | 4.56E-05 | 1.04e-5         | 7.4e-5           | 3.50E-04           |          |
|          | 1E-12           | 4.56E-06 | 1.04e-5         | 7.4e-5           | 6.84E-05           |          |
|          | 1E-13           | 4.56E-07 | 1.04e-5         | 7.4e-5           | 5.02E-05           |          |
|          | 1E-14           | 4.56E-08 | 1.04e-5         | 7.4e-5           | 4.86E-05           |          |



| $d_f(m)$ | $d_{source}(m)$ | $k(m^2)$ | $Q_{ck}(m^3/s)$ | $D_{eff}(m^2/s)$ | $D^{crack}(m^2/s)$ | $\alpha$ |
|----------|-----------------|----------|-----------------|------------------|--------------------|----------|
| 0.1      | 3               | 1E-10    | 6.80E-04        | 1.04e-5          | 7.4e-5             | 3.00E-03 |
|          |                 | 1E-11    | 6.80E-05        | 1.04e-5          | 7.4e-5             | 4.44E-04 |
|          |                 | 1E-12    | 6.80E-06        | 1.04e-5          | 7.4e-5             | 6.95E-05 |
|          |                 | 1E-13    | 6.80E-07        | 1.04e-5          | 7.4e-5             | 4.63E-05 |
|          |                 | 1E-14    | 6.80E-08        | 1.04e-5          | 7.4e-5             | 4.42E-05 |
|          | 5               | 1E-10    | 6.80E-04        | 1.04e-5          | 7.4e-5             | 2.31E-03 |
|          |                 | 1E-11    | 6.80E-05        | 1.04e-5          | 7.4e-5             | 3.12E-04 |
|          |                 | 1E-12    | 6.80E-06        | 1.04e-5          | 7.4e-5             | 4.77E-05 |
|          |                 | 1E-13    | 6.80E-07        | 1.04e-5          | 7.4e-5             | 3.16E-05 |
|          |                 | 1E-14    | 6.80E-08        | 1.04e-5          | 7.4e-5             | 3.02E-05 |
|          | 8               | 1E-10    | 6.80E-04        | 1.04e-5          | 7.4e-5             | 1.67E-03 |
|          |                 | 1E-11    | 6.80E-05        | 1.04e-5          | 7.4e-5             | 2.11E-04 |
|          |                 | 1E-12    | 6.80E-06        | 1.04e-5          | 7.4e-5             | 3.18E-05 |
|          |                 | 1E-13    | 6.80E-07        | 1.04e-5          | 7.4e-5             | 2.11E-05 |
|          |                 | 1E-14    | 6.80E-08        | 1.04e-5          | 7.4e-5             | 2.01E-05 |
|          | 11              | 1E-10    | 6.80E-04        | 1.04e-5          | 7.4e-5             | 1.27E-03 |
|          |                 | 1E-11    | 6.80E-05        | 1.04e-5          | 7.4e-5             | 1.58E-04 |
|          |                 | 1E-12    | 6.80E-06        | 1.04e-5          | 7.4e-5             | 2.36E-05 |
|          |                 | 1E-13    | 6.80E-07        | 1.04e-5          | 7.4e-5             | 1.56E-05 |
|          |                 | 1E-14    | 6.80E-08        | 1.04e-5          | 7.4e-5             | 1.50E-05 |
|          | 14              | 1E-10    | 6.80E-04        | 1.04e-5          | 7.4e-5             | 9.96E-04 |
|          |                 | 1E-11    | 6.80E-05        | 1.04e-5          | 7.4e-5             | 1.25E-04 |
|          |                 | 1E-12    | 6.80E-06        | 1.04e-5          | 7.4e-5             | 1.87E-05 |
|          |                 | 1E-13    | 6.80E-07        | 1.04e-5          | 7.4e-5             | 1.24E-05 |
|          |                 | 1E-14    | 6.80E-08        | 1.04e-5          | 7.4e-5             | 1.19E-05 |
|          | 18              | 1E-10    | 6.84E-04        | 1.04e-5          | 7.4e-5             | 7.76E-04 |
|          |                 | 1E-11    | 6.84E-05        | 1.04e-5          | 7.4e-5             | 9.87E-05 |
|          |                 | 1E-12    | 6.84E-06        | 1.04e-5          | 7.4e-5             | 1.47E-05 |
|          |                 | 1E-13    | 6.84E-07        | 1.04e-5          | 7.4e-5             | 9.71E-06 |
|          |                 | 1E-14    | 6.84E-08        | 1.04e-5          | 7.4e-5             | 9.27E-06 |

## Field data comparison

Data and map based upon Immediate Response action Completion Report and remedial Monitoring Report No. 11, RTN 3-23246, prepared by GEI consultants, November 2009. This is a site contaminated with chlorinated solvents.

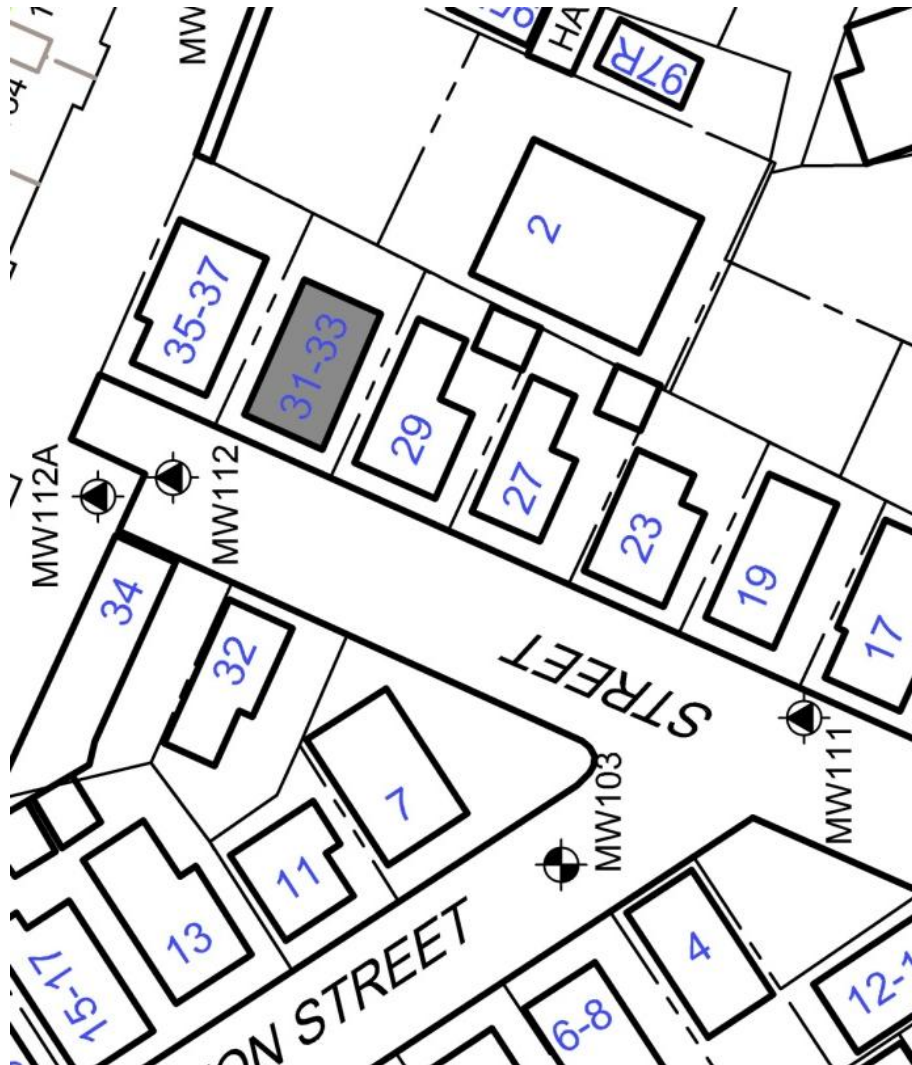

**Figure 1.** A portion of the site location showing the structure of interest. This is a residential neighborhood, consisting of many small parcels. The location of numerous groundwater monitoring wells is shown. Soil vapor was measured through the basement slab and indoor air concentration measured in the basement of the indicated building, which was located several hundred feet from the source area.

**TABLE 5.** Model Input Parameters

| <b>Building/foundation parameters</b>                                    | <b>Contaminant vapor source properties</b>                                                                                                                                                              |
|--------------------------------------------------------------------------|---------------------------------------------------------------------------------------------------------------------------------------------------------------------------------------------------------|
| Foundation foot print length: 14 m,<br>width: 8 m                        | Contaminant: PCE<br>Diffusivity of PCE in air ( $D^{air}$ ): $7.4 \times 10^{-6}$ m <sup>2</sup> /s<br>Effective diffusivity of PCE in soil ( $D_{eff}$ ): $1.01 \times 10^{-6}$ m <sup>2</sup> /s      |
| Depth of foundation ( $d_f$ ): 1 m bgs                                   | Measured contaminant concentration in groundwater:<br>198-261 ug/L                                                                                                                                      |
| Crack/foundation slab thickness( $d_{ck}$ ):<br>0.15 m                   | Henry's Law constant: 0.7                                                                                                                                                                               |
| Crack width( $w_{ck}$ ): 0.005 m                                         | Measured indoor air concentration( $c_{indoor}$ ): 163<br>ug/m <sup>3</sup>                                                                                                                             |
| Crack area( $A_{ck}$ ): 0.22 m <sup>2</sup>                              | Measured subslab soil vapor concentration( $c_{ck}$ ):<br>16400-21600 ug/m <sup>3</sup>                                                                                                                 |
| Volume of intruded area ( $V_b$ ): 1008 m <sup>3</sup>                   |                                                                                                                                                                                                         |
| Air exchange rate in intruded volume<br>( $A_e$ ): 0.45 hr <sup>-1</sup> |                                                                                                                                                                                                         |
| Depth to groundwater/source<br>( $d_{source}$ ): 3.5 m bgs               | <b>Soil gas flow properties</b>                                                                                                                                                                         |
| Pressure difference at the crack ( $\Delta p$ ):<br>-5 and -20 Pa        | Viscosity of air/soil gas ( $\mu_g$ ): $1.8648 \times 10^{-5}$ kg/m/s<br>Density of air/soil gas ( $\rho_g$ ): 1.1614kg/m <sup>3</sup><br>Soil permeability ( $k$ ): $1 \times 10^{-11}$ m <sup>2</sup> |

Note regarding the application mass conservation corrections to the J-E model results presented in Table 4 of the paper.

It is important to note that although Figure 6 (b) of the paper is for foundations with a depth of 0.1 and 2 m bgs, the influence of foundation depth is not very significant for cases with a permeability of  $10^{-11}$  m<sup>2</sup>, which means the mass conservation ratio can still be estimated from that figure for the 1 m deep basement of interest here. The small correction applied to the EPA J-E model does not result in much difference in this case, because  $R_f$  is around 1 for the given permeability.
